# Supplementary material
Source: PubMed Central journal article supplement (PMC10040384)
Supplement: mmc1.pdf [file mmc1.pdf]

## Supplemental information

### **A third SARS-CoV-2 mRNA vaccine dose in people receiving hemodialysis overcomes B cell defects but elicits a skewed CD4<sup>+</sup> T cell profile**

**G r my Sannier, Alexandre Nicolas, Mathieu Dub , Lorie Marchitto, Manon Nayrac, Olivier Tastet, Debashree Chatterjee, Alexandra Tauzin, Rapha l Lima-Barbosa, M lanie Laporte, Rose Cloutier, Alina M. Sreng Flores, Marianne Boutin, Shang Yu Gong, Mehdi Benlarbi, Shilei Ding, Catherine Bourassa, Gabrielle Gendron-Lepage, Halima Medjahed, Guillaume Goyette, Nathalie Brassard, Gloria-Gabrielle Delgado, Julia Niessl, Laurie Gokool, Chantal Morrissette, Pascale Arlotto, Norka Rios, C cile Tremblay, Val rie Martel-Laferr re, Alexandre Prat, Justin B lair, William Beaubien-Souigny, R mi Goupil, Annie-Claire Nadeau-Fredette, Caroline Lamarche, Andr s Finzi, Rita S. Suri, and Daniel E. Kaufmann**

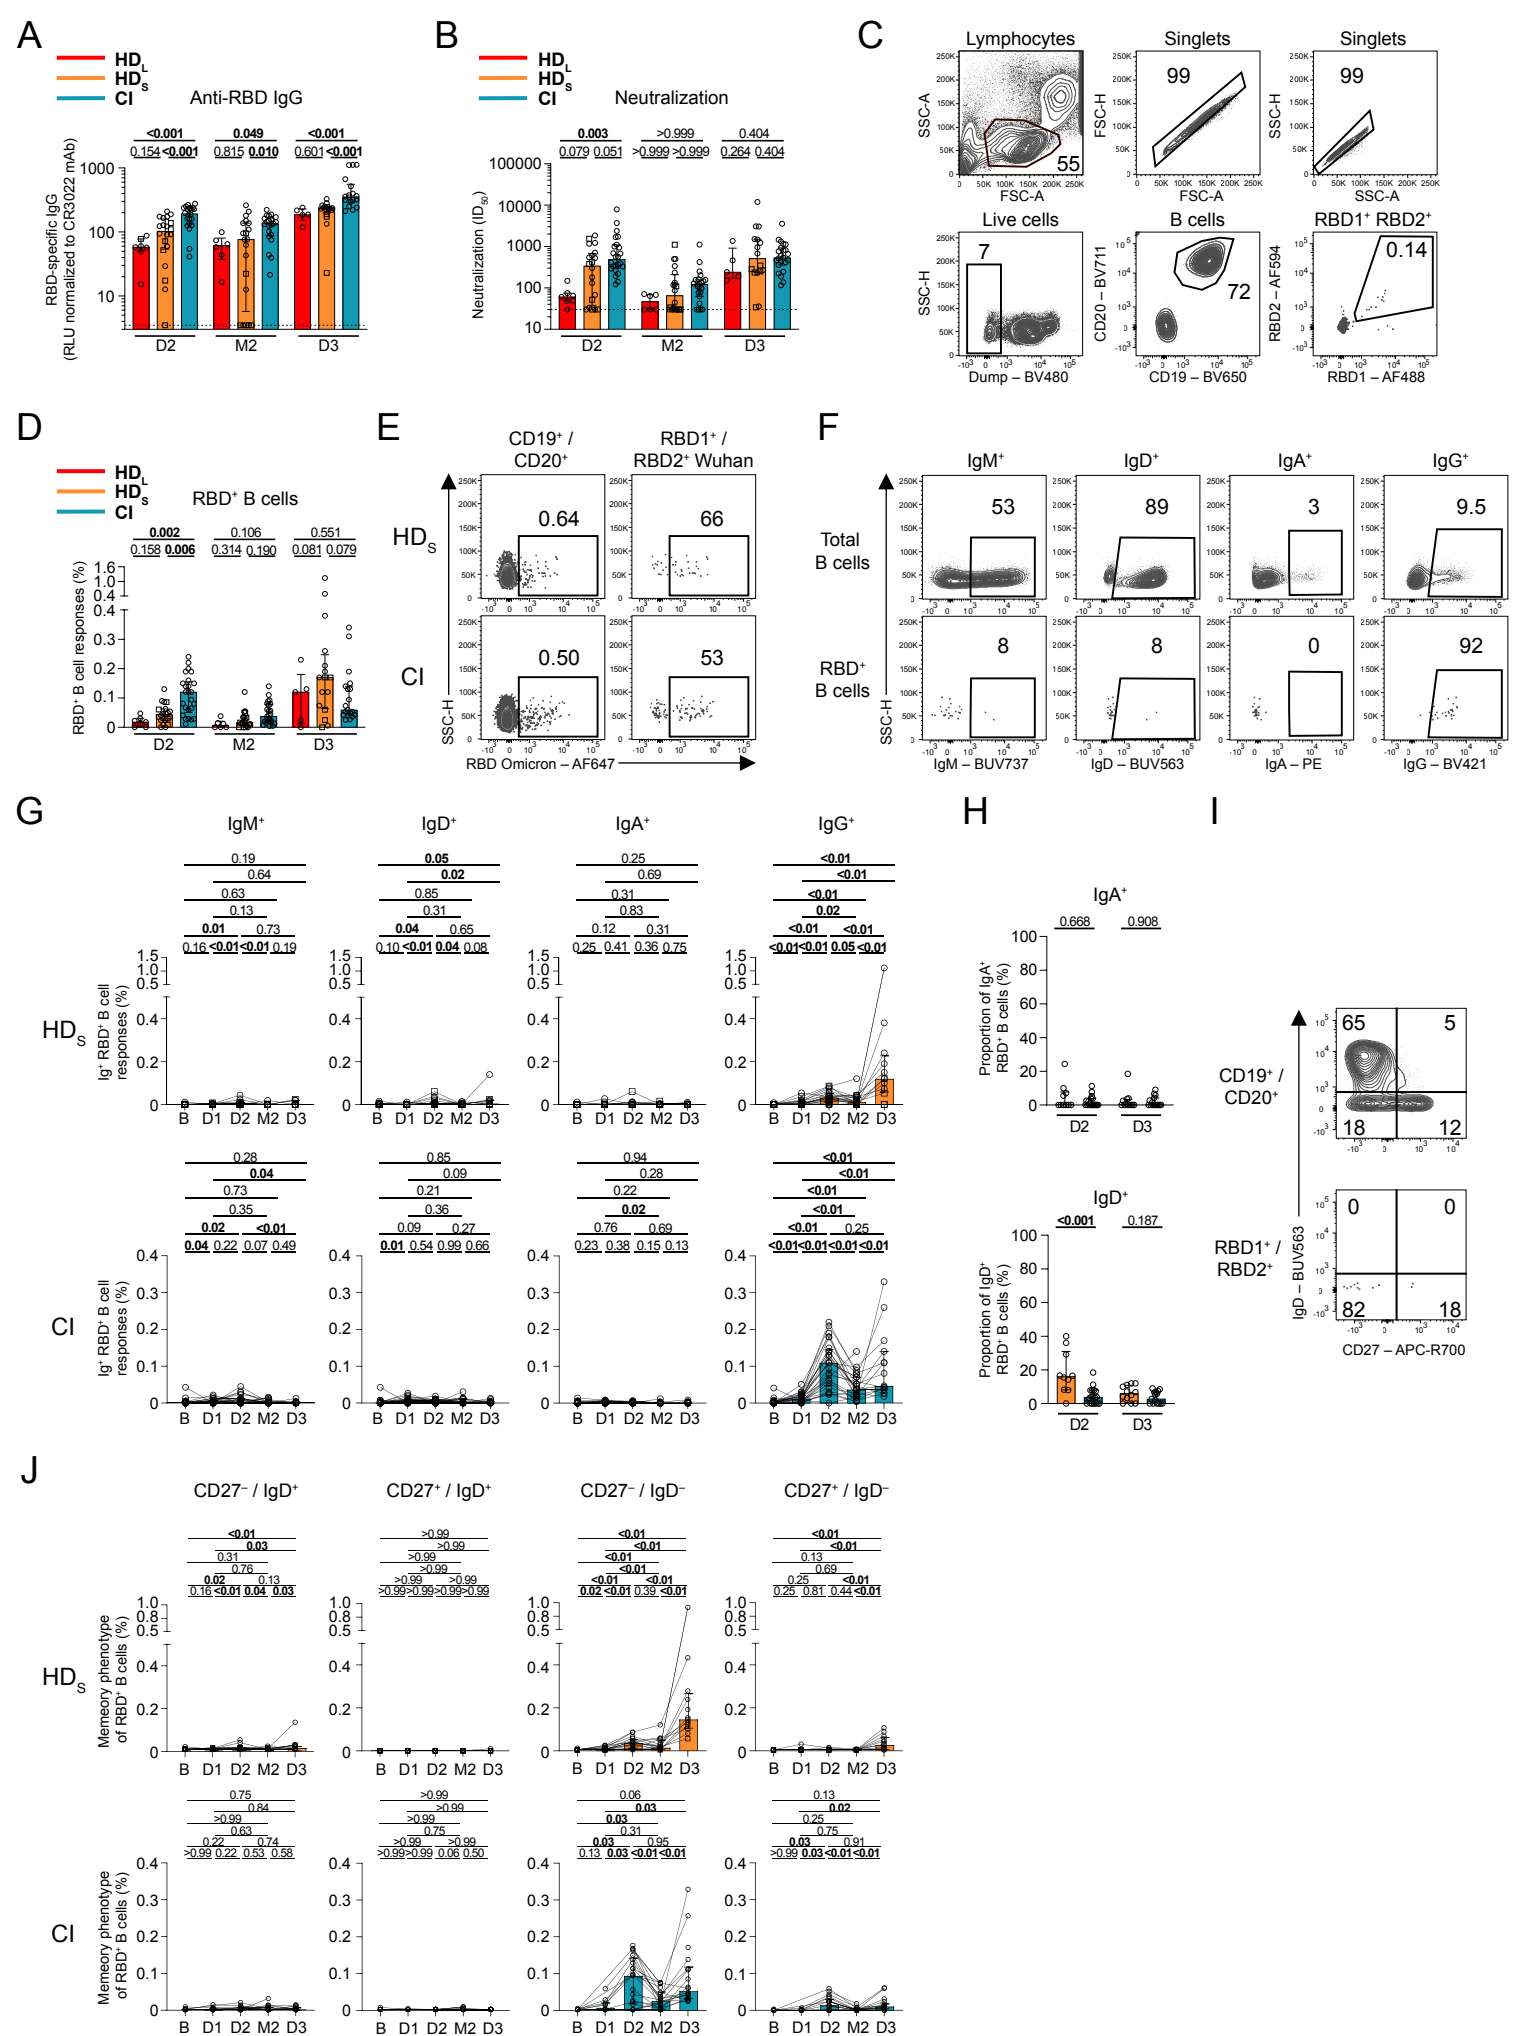

Figure S1

**Figure S1. Antibody and SARS-CoV-2-specific B cell responses in hemodialysis patients.**

**Related to Figure 1. (A)** Comparison of RBD-specific IgG responses between HD<sub>L</sub> (red), HD<sub>S</sub> (orange) and CI (blue) participants at D2, M2 and D3. HD<sub>S</sub> on immunosuppressive drugs are represented by square symbols, and HD<sub>S</sub> not on immunosuppressants are represented by circles. Bars represent medians ± interquartile ranges. Intercohort statistical comparisons using a linear mixed model are shown. **(B)** Comparison of neutralizing activity between HD<sub>L</sub> (red), HD<sub>S</sub> (orange) and CI (blue) participants at D2, M2 and D3. HD<sub>S</sub> on immunosuppressive drugs are represented by square symbols, and HD<sub>S</sub> not on immunosuppressants are represented by circles. Bars represent medians ± interquartile ranges. Intercohort statistical comparisons using a linear mixed model are shown. **(C)** Gating strategy to identify RBD<sup>+</sup> B cells. **(D)** Comparison of RBD<sup>+</sup> B cell responses between HD<sub>L</sub> (red), HD<sub>S</sub> (orange) and CI (blue) participants at D2, M2 and D3. HD<sub>S</sub> on immunosuppressive drugs are represented by square symbols, and HD<sub>S</sub> not on immunosuppressants are represented by circles. Bars represent medians ± interquartile ranges. Intercohort statistical comparisons using a linear mixed model are shown. **(E)** Gating strategy of Omicron RBD<sup>+</sup> B cells among total B cells (left) and among Wuhan-1-RBD<sup>+</sup> B cells (right). **(F)** Examples of gatings for IgD, IgM, IgA and IgG expression on total CD19<sup>+</sup>CD20<sup>+</sup> B cells (left) or RBD<sup>+</sup> B cells (right). **(G)** Histograms reporting the longitudinal frequency of isotype expression in HDs (orange) and CI (blue) participants. Lines connect data points for individual participants. Wilcoxon tests are shown above each panel. **(H)** Comparison of IgD<sup>+</sup> and IgA<sup>+</sup> RBD<sup>+</sup> B cells between HD<sub>S</sub> and CI participants at D2 and D3. Mann-Whitney tests are shown. **(I)** Gating strategy of IgD<sup>+/-</sup> and CD27<sup>+/-</sup> of total (left) and RBD<sup>+</sup> memory B cells (right). **(J)** Histograms reporting the longitudinal frequency of each IgD and CD27 RBD-B phenotypes in CD19<sup>+</sup> CD20<sup>+</sup> B cells for HDs (orange) and CI (blue) participants. In support of the pie charts displayed in Figure 1K. Wilcoxon tests are shown above. In ABD) n=7 HD<sub>L</sub>, n=20 HD<sub>S</sub>, n=26 CI. GJ) n=20 HDs, n=26 CI. H) n=16 HDs, n=23 CI.

Figure S2

A

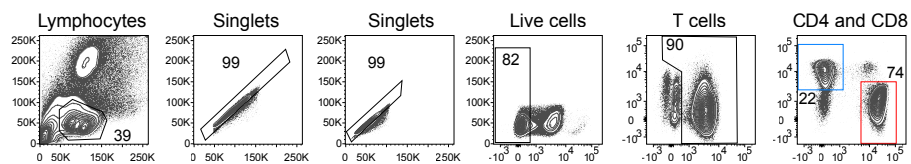

B

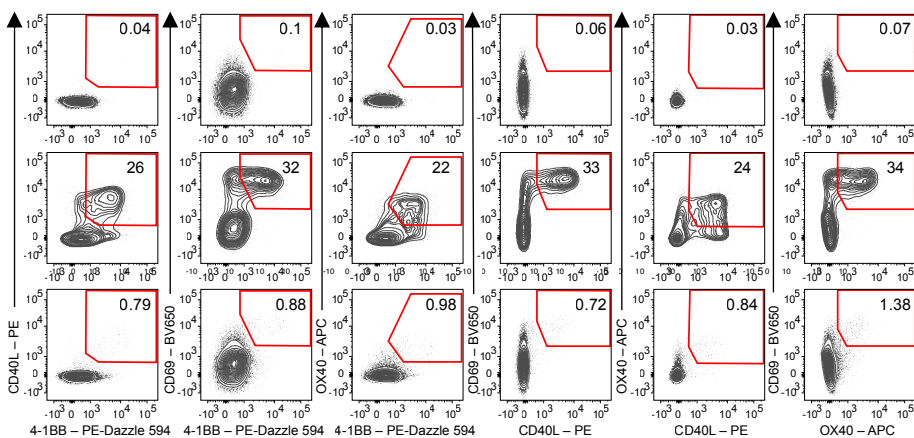

E

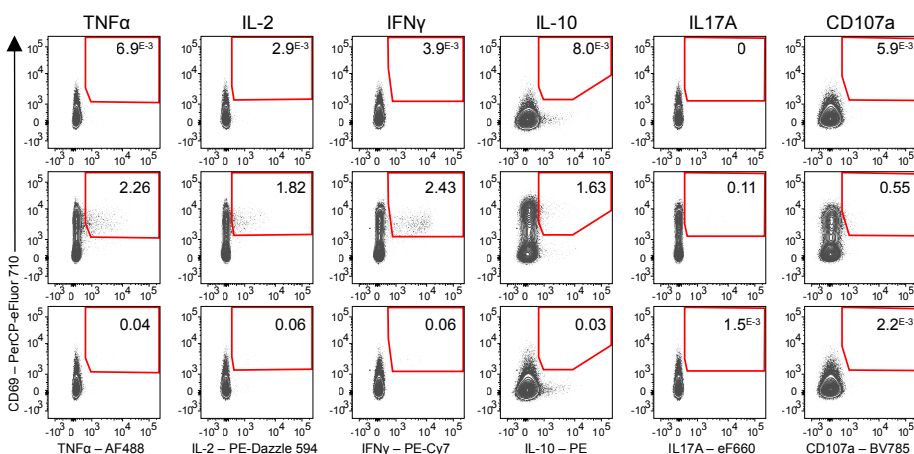

H

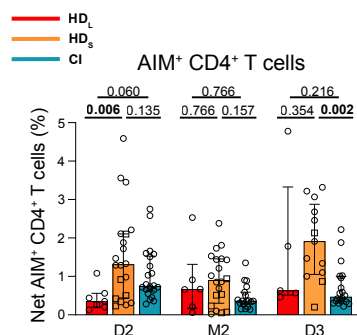

I

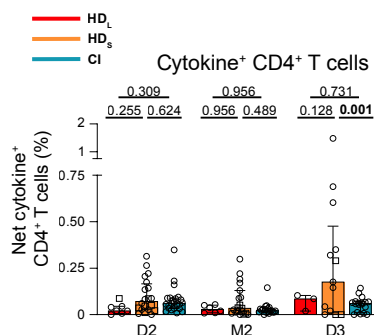

J

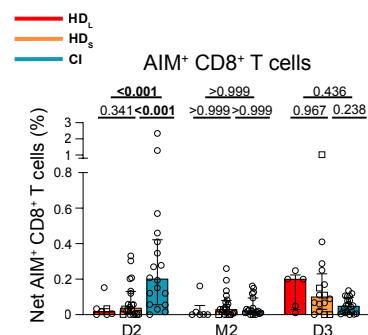

C

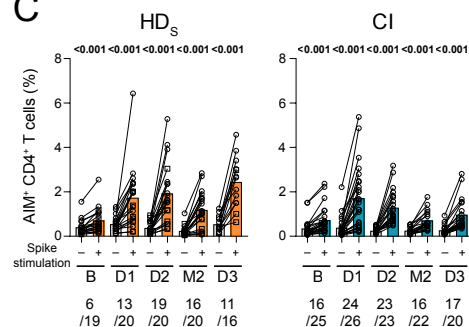

D

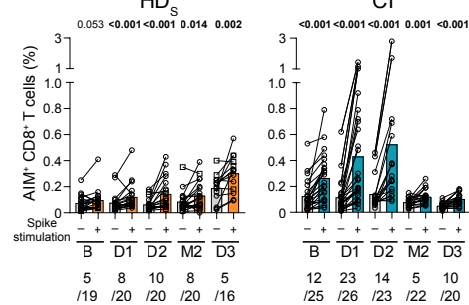

F

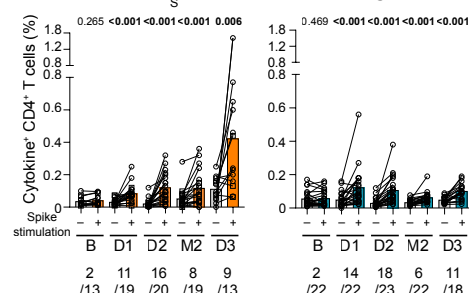

G

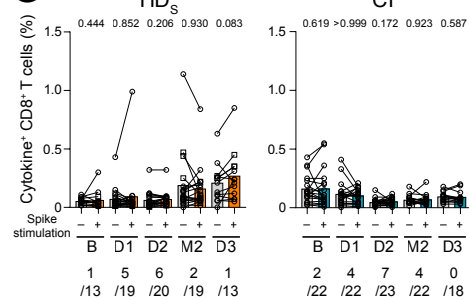

**Figure S2. SARS-CoV-2-specific T cell responses in hemodialysis patients. Related to Figure 2.** (A) Representative upstream generic gating and (B) ORgate strategy to identify SARS-CoV-2-specific AIM<sup>+</sup> T cells. For simplicity, the example focuses on CD4<sup>+</sup> T cells. (C) Raw frequencies of AIM<sup>+</sup> CD4<sup>+</sup> and (D) CD8<sup>+</sup> T cells following *ex vivo* stimulation of PBMCs with a pool of SARS-CoV-2 Spike peptides (colored). HD<sub>S</sub> are represented on the left and CI on the right for each panel. As a control, PBMCs cells were left unstimulated (grey bars). HD<sub>S</sub> on immunosuppressive drugs are represented by square symbols, and HD<sub>S</sub> not on immunosuppressants are represented by circles. The bars represent median values. Wilcoxon tests are shown. The numbers of responders at least two times over unstimulated conditions are written below the histograms for each timepoint. (E) Representative ORgate strategy to identify SARS-CoV-2-specific cytokine-expressing T cells. For simplicity, the example focuses on CD4 T cells. (F) Raw frequencies of cytokine-expressing CD4<sup>+</sup> T cells and (G) CD8<sup>+</sup> T cells following *ex vivo* stimulation of PBMCs with a pool of SARS-CoV-2 Spike peptides (colored). HD<sub>S</sub> are represented on the left and CI on the right for each panel. As a control, PBMCs cells were left unstimulated (grey bars). HD<sub>S</sub> on immunosuppressive drugs are represented by square symbols, and HD<sub>S</sub> not on immunosuppressants are represented by circles. The bars represent median values. Wilcoxon tests are shown. The numbers of responders at least two times over unstimulated conditions are written below the histograms for each timepoint. (HIJ) Comparison at D2, M2 and D3 of (H) net AIM<sup>+</sup> CD4<sup>+</sup> T cell responses, (I) net cytokines<sup>+</sup> CD4<sup>+</sup> responses and (J) net AIM<sup>+</sup> CD8<sup>+</sup> responses between HD<sub>L</sub> (red), HD<sub>S</sub> (orange) and CI (blue) participants. HD<sub>S</sub> on immunosuppressive drugs are represented by square symbols, and HD<sub>S</sub> not on immunosuppressants are represented by circles. The bars represent median and interquartile ranges. Intercohort statistical comparisons using a linear mixed model. In A-G) n=20 HD<sub>S</sub>, n=26 CI participants, in H-J) n=20 HD<sub>S</sub>, n=26 CI, n=7 HD<sub>L</sub> participants.

Figure S3

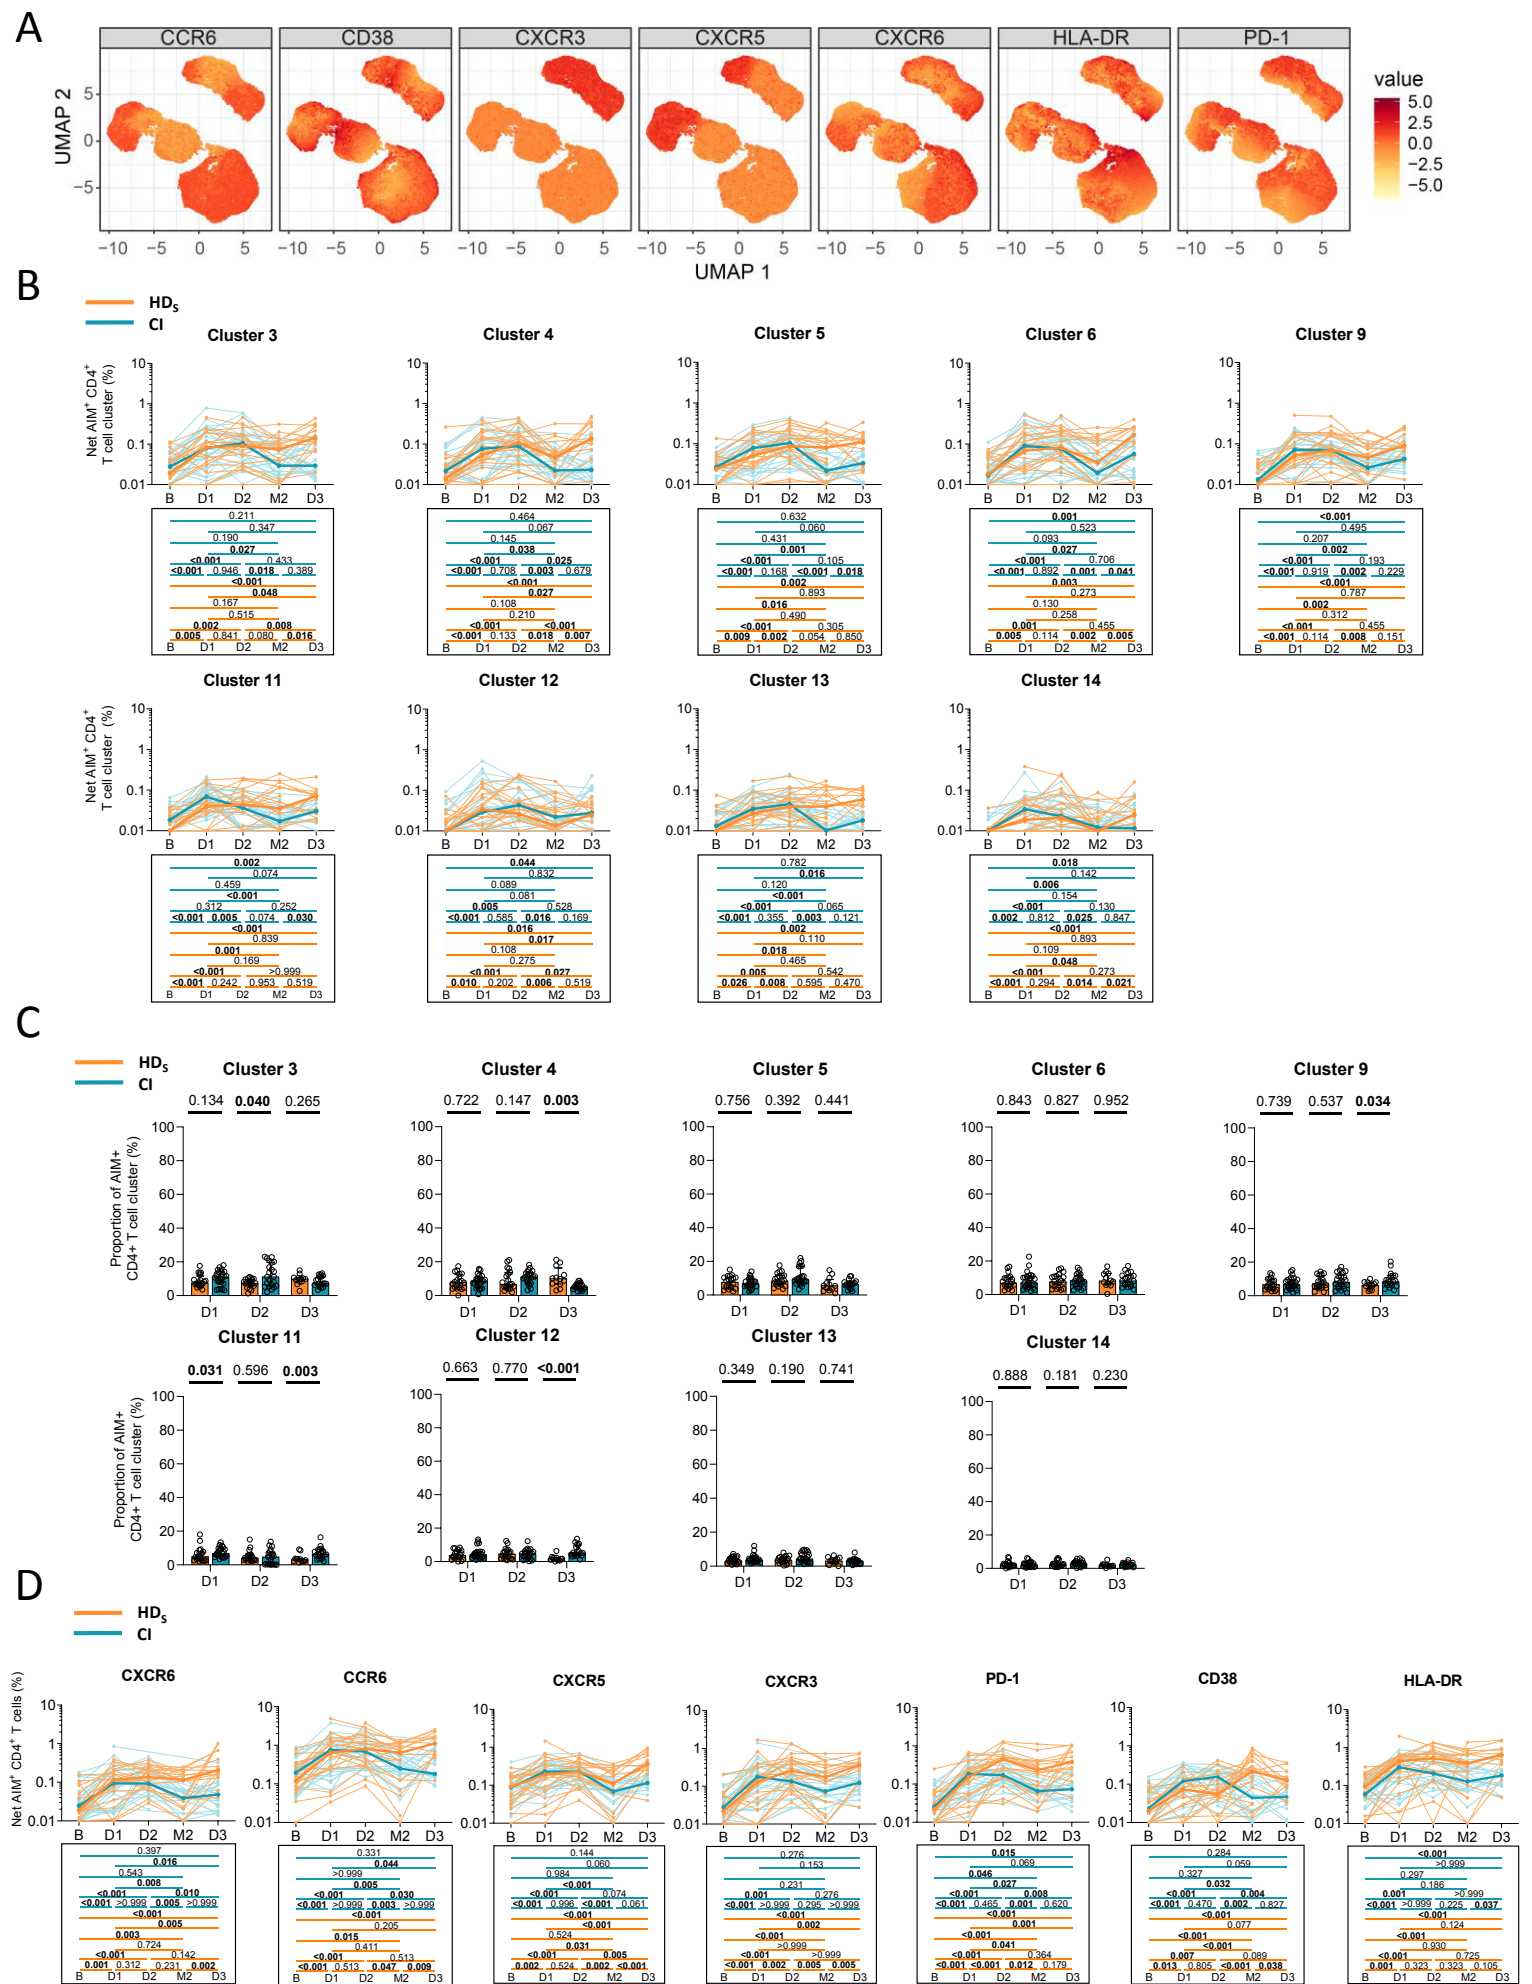

**Figure S3. Phenotypic characterization of SARS-CoV-2-specific CD4<sup>+</sup> T cell responses in hemodialysis patients. Related to Figure 3. (A)** Heat map overlaid on the AIM<sup>+</sup> UMAP showing the gradient of expression for each marker. **(B)** Longitudinal analysis of net AIM<sup>+</sup> CD4<sup>+</sup> T cell clusters, regarding clusters 3, 4, 5, 6, 9, 11, 12, 13, and 14 for HD<sub>s</sub> (orange, n=20) and CI (blue; n=26) participants. Lines connect data from the same donor. Bold lines represent median values. Wilcoxon tests are shown below for each pairwise comparison. Complement Figure 3E. **(C)** Proportions of AIM<sup>+</sup> clusters 3, 4, 5, 6, 9, 11, 12, 13 and 14 among AIM<sup>+</sup> CD4<sup>+</sup> T cells in HD<sub>s</sub> and CI at D1, D2 and D3. Bars represent medians ± interquartile ranges. Mann-Whitey tests are shown. Complement Figure 3F. **(D)** Longitudinal frequencies of CCR6<sup>+</sup>, CXCR5<sup>+</sup>, CXCR3<sup>+</sup>, PD-1<sup>+</sup>, CD38<sup>+</sup> and HLA-DR<sup>+</sup> AIM<sup>+</sup> CD4<sup>+</sup> T cells in HD<sub>s</sub> (orange) and CI (blue). Lines connect data from the same donor. The bold lines represent the median value of each cohort. Statistical comparisons using a linear mixed model.

Figure S4

A

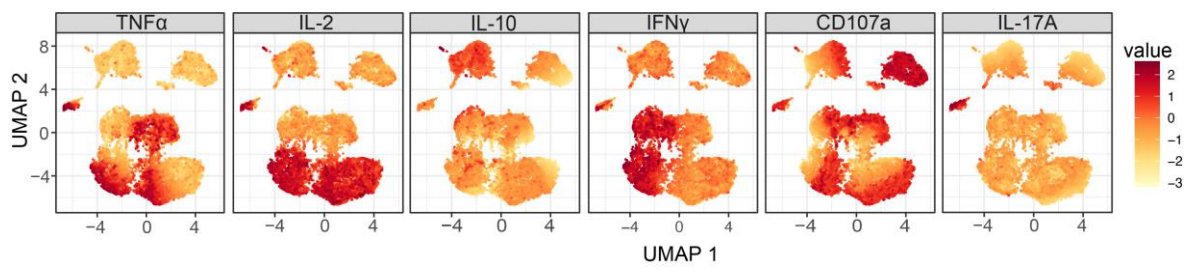

B

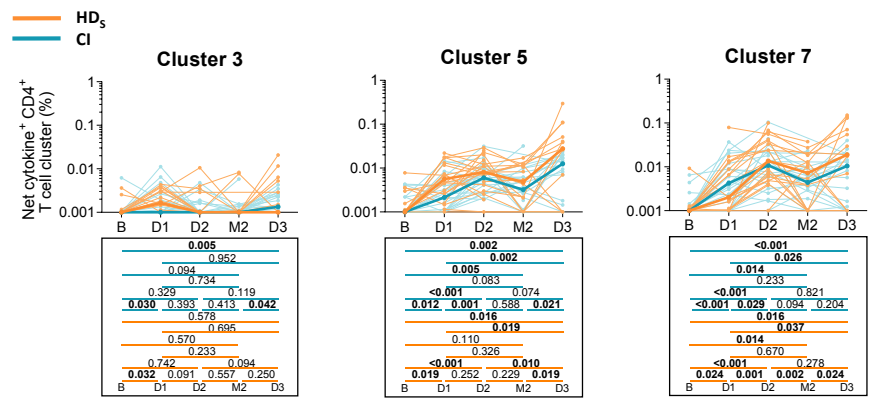

C

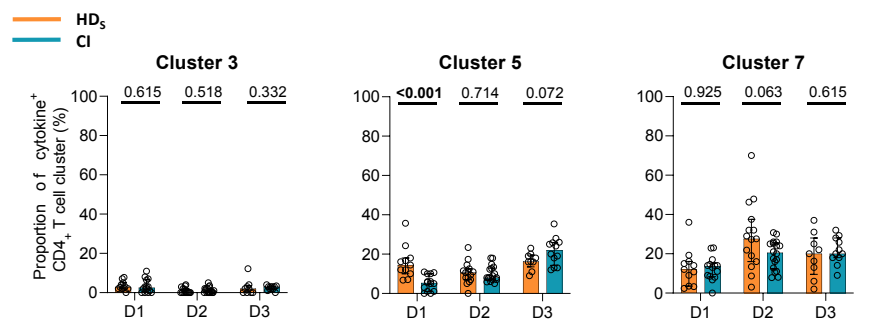

D

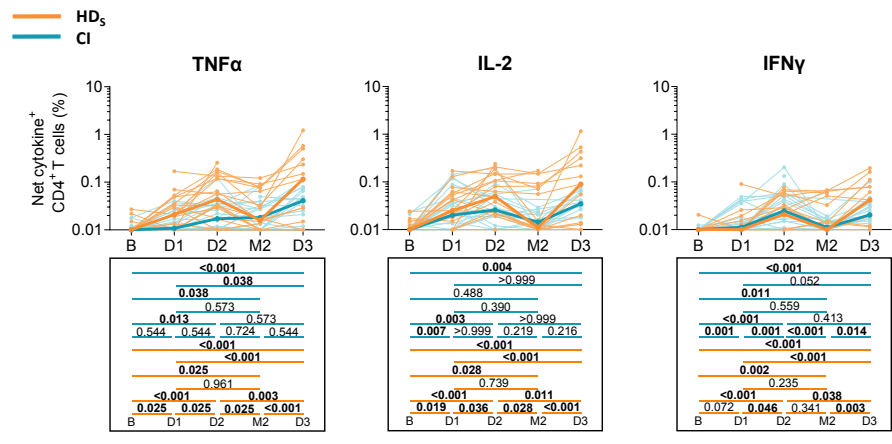



**Figure S4. Effector functions profiling of SARS-CoV-2-specific CD4<sup>+</sup> T cells responses in hemodialysis patients. Related to Figure 4. (A)** Heat map overlaid on the cytokine<sup>+</sup> UMAP showing the gradient of expression for each marker. **(B)** Longitudinal analysis of net cytokine<sup>+</sup> CD4<sup>+</sup> T cell clusters, regarding clusters 3, 5 and 7 for HD<sub>s</sub> (orange, n=20) and CI (blue; n=26) participants. Lines connect data from the same donor. Bold lines represent median values. Wilcoxon tests are shown below for each pairwise comparison. Complement Figure 4E. **(C)** Proportions of cytokine<sup>+</sup> clusters 3, 5 and 7 among cytokine<sup>+</sup> CD4<sup>+</sup> T cells in HD<sub>s</sub> and CI at D1, D2 and D3. Bars represent medians ± interquartile ranges. Mann-Whitey tests are shown. Complement Figure 4F. **(D)** Longitudinal frequencies of TNFα<sup>+</sup>, IL-2<sup>+</sup> and IFNγ<sup>+</sup> CD4<sup>+</sup> T cells in HD<sub>s</sub> (orange) and CI (blue). Lines connect data from the same donor. The bold line represents the median value of each cohort. Statistical comparisons using a linear mixed model.

Figure S5

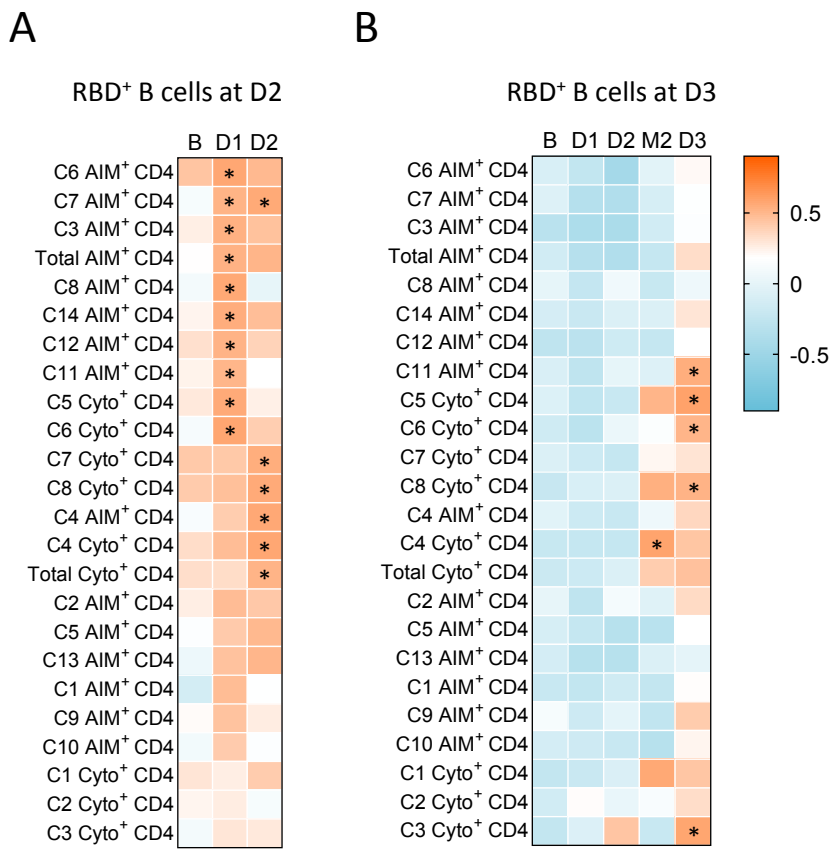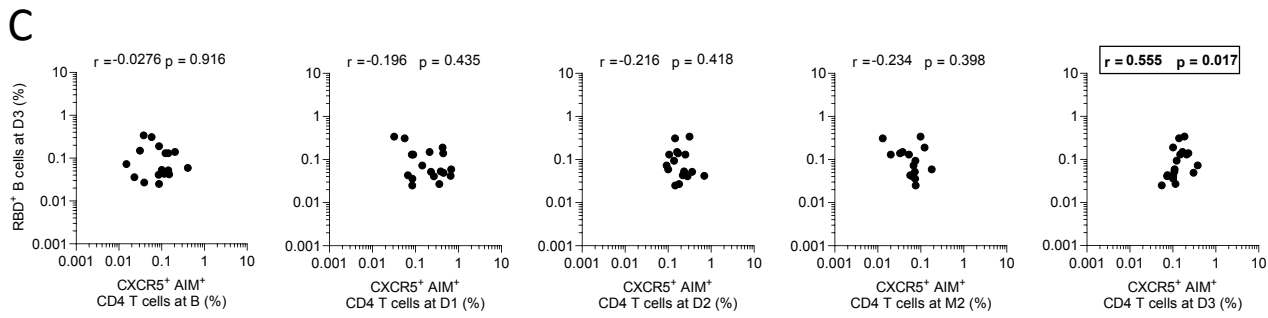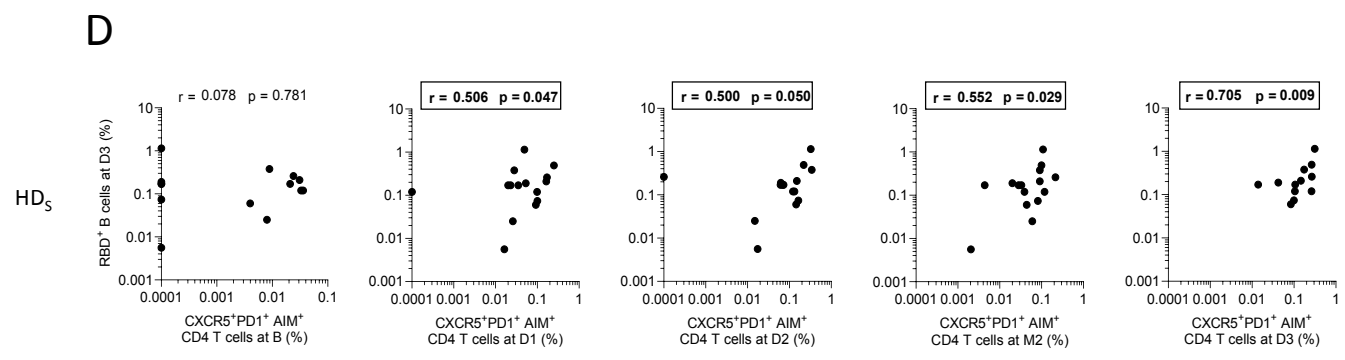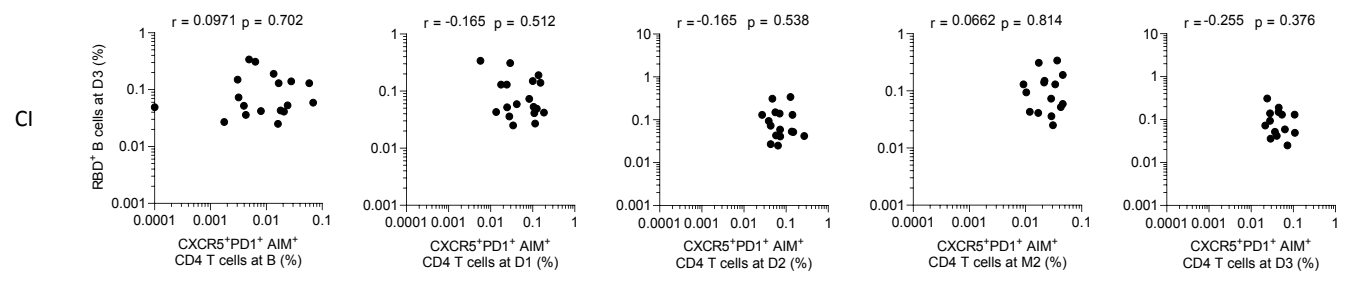

**Figure S5: Associations between RBD<sup>+</sup> B cell and SARS-CoV-2-specific CD4<sup>+</sup> T cell responses in hemodialysis patients. Related to Figure 5.** Temporal relationships between S-specific CD4<sup>+</sup> T cells and RBD<sup>+</sup> B cells. **(A)** Correlation between total CD4<sup>+</sup> T cell frequencies at B-D2 and RBD<sup>+</sup> B cell frequencies at D2 in CI (n=26). **(B)** Correlation between total CD4<sup>+</sup> T cell frequencies at B-D3 and RBD<sup>+</sup> B cell frequencies at D3 in CI (n = 26). Asterisks indicate statistically significant p value from a Spearman test (p<0.05). Colors indicate Spearman r. **(C)** Correlations between frequencies of AIM<sup>+</sup> CXCR5<sup>+</sup> CD4<sup>+</sup> T cells (for cTfh) at the B–D3 visits and RBD<sup>+</sup> B cell frequencies at D3 in CI. The r and p values from a Spearman test are indicated in each graph. **(D)** Correlations between frequencies of AIM<sup>+</sup> CXCR5<sup>+</sup> PD-1<sup>+</sup> CD4<sup>+</sup> T cells (for PD-1<sup>+</sup> cTfh) at the B–D3 visits and RBD<sup>+</sup> B cell frequencies at D3 in HD<sub>s</sub> (top) and CI (bottom). The r and p values from a Spearman test are indicated in each graph.

**Table S1. Clinical characteristics of the hemodialysis cohorts<sup>†</sup>. Related to Table 1.**

| Cohorts                             | Patients ID | Cause of ESRD   | Years on HD           | Comorbidities |          |          |               |              |          |          |          |          |           | Immunomodulating characteristics |                               |                          |   |   |
|-------------------------------------|-------------|-----------------|-----------------------|---------------|----------|----------|---------------|--------------|----------|----------|----------|----------|-----------|----------------------------------|-------------------------------|--------------------------|---|---|
|                                     |             |                 |                       | DM            | Cancer   | CAD      | Heart failure | Stroke / TIA | PVD      | COPD     | HBV      | HCV      | Cirrhosis | Previous kidney transplant       | Immuno-suppressant medication | HIV                      |   |   |
| HDs                                 | 1072-36     | PCKD            | 15                    | N             | N        | N        | N             | N            | N        | N        | N        | N        | N         | N                                | Y                             | Prednisone, Cyclosporine | N |   |
|                                     | 1072-37     | GN              | 4.3                   | Y             | Y        | N        | N             | N            | N        | N        | N        | N        | N         | N                                | N                             | N                        | N |   |
|                                     | 1072-38     | GN              | 2.6                   | N             | N        | N        | N             | N            | N        | N        | N        | N        | N         | N                                | N                             | N                        | N |   |
|                                     | 1072-46     | Atypical HUS    | 14.4                  | N             | N        | N        | N             | N            | N        | N        | N        | N        | N         | N                                | Y                             | Prednisone               | N |   |
|                                     | 1072-56     | HTN             | 28.4                  | N             | N        | N        | N             | Y            | N        | N        | N        | N        | N         | N                                | Y                             | N                        | N |   |
|                                     | 1072-61     | GN              | 13.2                  | N             | N        | N        | N             | N            | N        | N        | N        | N        | N         | N                                | Y                             | Prednisone, Tacrolimus   | N |   |
|                                     | 1072-64     | DM vs GN        | 2.7                   | Y             | N        | Y        | N             | N            | N        | N        | N        | N        | N         | N                                | N                             | N                        | N | N |
|                                     | 1072-66     | GN              | 10.4                  | N             | N        | N        | N             | N            | N        | N        | N        | N        | N         | N                                | N                             | N                        | N | N |
|                                     | 1072-68     | GN              | 8.2                   | N             | N        | N        | N             | N            | N        | N        | N        | N        | Y         | N                                | N                             | N                        | N |   |
|                                     | 1072-72     | DM              | 3.7                   | Y             | N        | N        | N             | N            | N        | N        | N        | N        | N         | N                                | N                             | N                        | N | N |
|                                     | 1072-84     | HTN             | 8.5                   | N             | N        | N        | N             | N            | N        | N        | Y        | N        | N         | N                                | N                             | N                        | N | N |
|                                     | 1072-86     | Alport syndrome | 23.4                  | N             | N        | N        | N             | N            | N        | N        | N        | N        | N         | N                                | Y                             | Tacrolimus               | N |   |
|                                     | 1072-94     | GN              | 13.4                  | Y             | N        | N        | N             | N            | N        | N        | N        | N        | N         | N                                | Y                             | Prednisone, Tacrolimus   | N |   |
|                                     | 1072-103    | DM              | 4.2                   | Y             | N        | N        | N             | N            | N        | N        | Y        | Y        | N         | N                                | N                             | N                        | N | N |
|                                     | 1072-104    | DM              | 0.9                   | Y             | Y        | N        | N             | N            | N        | N        | N        | N        | N         | N                                | N                             | N                        | N | N |
|                                     | 1072-105    | GN              | 5.5                   | Y             | Y        | N        | N             | N            | N        | N        | N        | N        | N         | N                                | Y                             | Tacrolimus               | N |   |
|                                     | 1072-106    | DM              | 0.4                   | Y             | N        | N        | N             | N            | N        | N        | N        | N        | N         | N                                | N                             | N                        | N | N |
|                                     | 1072-116    | DM & HTN        | 2.6                   | Y             | N        | N        | N             | N            | N        | N        | N        | N        | N         | N                                | N                             | N                        | N | N |
|                                     | 1072-117    | GN              | 0.2                   | N             | N        | N        | N             | N            | N        | N        | N        | N        | N         | N                                | N                             | N                        | N | N |
| 1073-111                            | DM          | 0.2             | Y                     | N             | Y        | Y        | N             | N            | N        | N        | N        | N        | N         | N                                | N                             | N                        | N |   |
| <b>Median (Interquartile range)</b> |             |                 | <b>4.9 (2.6-13.3)</b> | <b>10</b>     | <b>2</b> | <b>2</b> | <b>1</b>      | <b>1</b>     | <b>0</b> | <b>0</b> | <b>2</b> | <b>2</b> | <b>2</b>  | <b>7</b>                         | <b>6</b>                      | <b>0</b>                 |   |   |
| HDL                                 | 1071-03     | DM              | 3.9                   | Y             | N        | Y        | N             | Y            | N        | N        | N        | N        | N         | N                                | N                             | N                        | N |   |
|                                     | 1071-07     | DM              | 6.8                   | Y             | N        | N        | N             | N            | N        | N        | N        | N        | N         | N                                | N                             | N                        | N |   |
|                                     | 1071-08     | DM              | 6.3                   | Y             | N        | N        | N             | N            | N        | N        | N        | N        | N         | N                                | N                             | Prednisone               | N |   |
|                                     | 1071-38     | DM              | 0.6                   | Y             | N        | N        | N             | N            | N        | N        | Y        | N        | N         | N                                | N                             | N                        | N |   |
|                                     | 1071-42     | DM              | 5.9                   | Y             | N        | N        | N             | N            | N        | Y        | Y        | N        | N         | N                                | N                             | N                        | N |   |
|                                     | 1071-43     | GN              | 2.0                   | N             | N        | N        | N             | N            | N        | Y        | N        | N        | N         | N                                | N                             | N                        | N |   |
|                                     | 1071-51     | HTN             | 3.5                   | N             | N        | N        | N             | N            | N        | N        | N        | N        | N         | N                                | N                             | N                        | N |   |
| <b>Median (Interquartile range)</b> |             |                 | <b>3.9 (2.8-6.1)</b>  | <b>5</b>      | <b>0</b> | <b>1</b> | <b>0</b>      | <b>1</b>     | <b>0</b> | <b>2</b> | <b>2</b> | <b>0</b> | <b>0</b>  | <b>0</b>                         | <b>1</b>                      | <b>0</b>                 |   |   |

*Sannier, Nicolas et al.*

† Values displayed are absolute numbers and percentages for categorical variables.

CAD = Coronary Artery Disease; COPD = Chronic Obstructive Pulmonary Disease; DM = Diabetes Mellitus; GN = Glomerulonephritis; HBV = Hepatitis B Virus; HCV = Hepatitis C Virus; HIV = Human Immunodeficiency Virus; HTN = Hypertension; HUS = Hemolytic Uremic Syndrome; PCKD = Polycystic Kidney Disease; PVD = Perivascular Disease; TIA = Transient Ischemic Attack.

N = No; Y = Yes.

**Table S2. Flow cytometry antibody staining panel for B cells characterization. Related to STAR Methods, Main Figure 1, Supplementary Figure 1.**

| <b>Marker – Fluorophore</b> | <b>Clone</b> | <b>Source</b>            | <b>Catalog #</b> |
|-----------------------------|--------------|--------------------------|------------------|
| CD3 – BV480                 | UCHT1        | BD Biosciences           | 566105           |
| CD14 – BV480                | M5E2         | BD Biosciences           | 746304           |
| CD16 – BV480                | 3G8          | BD Biosciences           | 566108           |
| CD19 – BV650                | SJ25C1       | Biologend                | 363026           |
| CD20 – BV711                | 2H7          | Biologend                | 563126           |
| CD21 – BV786                | B-LY4        | BD Biosciences           | 740969           |
| CD24 – BUV805               | ML5          | BD Biosciences           | 742010           |
| CD27 – APC-R700             | M-T271       | BD Biosciences           | 565116           |
| CD38 – BB790                | HIT2         | BD Biosciences           | CUSTOM           |
| CD56 – BV480                | NCAM16.2     | BD Biosciences           | 566124           |
| CD138 – BUV661              | MI15         | BD Biosciences           | 5 749873         |
| CCR10 – BUV395              | 1B5          | BD Biosciences           | 565322           |
| HLA-DR – BB700              | G46-6        | BD Biosciences           | 566480           |
| IgA – PE                    | IS11-8E10    | Miltenyi                 | 130-113-476      |
| IgD – BUV563                | IA6-2        | BD Biosciences           | 741394           |
| IgG – BV421                 | G18-147      | BD Biosciences           | 562581           |
| IgM – BUV737                | UCH-B1       | Thermo Fisher Scientific | 748928           |
| LIVE/DEAD Fixable dead cell | N/A          | Thermo Fisher Scientific | L34960           |

**Table S3. Flow cytometry antibody staining panel for activation-induced marker assay. Related to STAR Methods, Main Figure 2 and 3, Supplementary Figure 2 and 3.**

| <b>Marker – Fluorophore</b>   | <b>Clone</b> | <b>Source</b>            | <b>Catalog #</b> |
|-------------------------------|--------------|--------------------------|------------------|
| CD3 – BUV496                  | UCHT1        | BD Biosciences           | 612941           |
| CD4 – BB630                   | SK3          | BD Biosciences           | 624294           |
| CD8 – BV570                   | RPA-T8       | Biolegend                | 301037           |
| CD14 – BV480                  | M5E2         | BD Biosciences           | 746304           |
| CD19 – BV480                  | HIB19        | BD Biosciences           | 746457           |
| CD38 – BB790                  | HIT2         | BD Biosciences           | CUSTOM           |
| CD45RA – PerCP Cy5.5          | HI100        | BD Biosciences           | 563429           |
| CD69 – BV650                  | FN50         | Biolegend                | 310934           |
| CD134 (OX40) - APC            | ACT35        | BD Biosciences           | 563473           |
| CD137 (4-1BB) – PE-Dazzle 594 | 4B4-1        | Biolegend                | 309826           |
| CD154 (CD40L) - PE            | TRAP1        | BD Biosciences           | 555700           |
| CD183 (CXCR3) – BV605         | G025H7       | Biolegend                | 353728           |
| CD185 (CXCR5) – BV421         | J25D4        | Biolegend                | 356920           |
| CD186 (CXCR6) – BUV805        | 13B 1E5      | BD Biosciences           | 748448           |
| CD196 (CCR6) – BUV737         | 11A9         | BD Biosciences           | 564377           |
| CD279 (PD1) – BV711           | EH122H       | Biolegend                | 329928           |
| HLA-DR – FITC                 | LN3          | Biolegend                | 327005           |
| LIVE/DEAD Fixable dead cell   | N/A          | Thermo Fisher Scientific | L34960           |

**Table S4. Flow cytometry antibody staining panel for intracellular cytokine staining assay. Related to STAR Methods, Main Figure 2 and 4, Supplementary Figure 2 and 4.**

| <b>Marker – Fluorophore</b>     | <b>Clone</b> | <b>Source</b>            | <b>Catalog #</b> |
|---------------------------------|--------------|--------------------------|------------------|
| CD3 – BUV395                    | UCHT1        | BD Biosciences           | 563546           |
| CD4 – BV711                     | L200         | BD Biosciences           | 563913           |
| CD8 – BV570                     | RPA-T8       | Biolegend                | 301037           |
| CD14 – BUV805                   | M5E2         | BD Biosciences           | 612902           |
| CD16 – BV650                    | 3G8          | Biolegend                | 302042           |
| CD19 – APC-eFluor780            | HIB19        | Thermo Fisher Scientific | 47-0199          |
| CD56 – BUV737                   | NCAM16.2     | BD Biosciences           | 564448           |
| CD69 – PerCP-eFluor710          | FN50         | Thermo Fisher Scientific | 46-0699-42       |
| CD107A – BV786                  | H4A3         | BD Biosciences           | 563869           |
| IFN- $\gamma$ – PECy7           | B27          | BD Biosciences           | 557643           |
| CD154 (CD40L) – BV421           | TRQP1        | BD Biosciences           | 563886           |
| IL-2 – PE-Dazzle 594            | MQ1-17H12    | Biolegend                | 500344           |
| IL-10 – PE                      | JES3-9D7     | BD Biosciences           | 554498           |
| IL-17A – eFluor660              | eBio64CAP17  | Thermo Fisher Scientific | 50-7179-42       |
| TNF- $\alpha$ – Alexa Fluor 488 | Mab11        | Thermo Fisher Scientific | 502915           |
| Granzym B – Alexa Fluor 700     | GB11         | BD Biosciences           | 561016           |
| LIVE/DEAD Fixable dead cell     | N/A          | Thermo Fisher Scientific | L34960           |
